# Supplementary material for: Evolution of 3D nanoporosity and morphology in selectively dealloying ternary Au55Cu25Si20 metallic glass ribbon with enhanced alcohol electro-oxidation performance
Source: Royal Society of Chemistry journal article supplement (doi:10.1039/c8nr04926b), 2018-01-01
Supplement: c8nr04926b1.pdf [file c8nr04926b1.pdf]

# Evolution of 3D nanoporosity and morphology in selectively dealloying ternary $\text{Au}_{55}\text{Cu}_{25}\text{Si}_{20}$ metallic glass ribbon with enhanced alcohol electro-oxidation performance

*Yi Xu, Junye Cheng, Pak Man Yiu, Guangcun Shan\*, Tamaki Shibayama, Seiichi Watanabe, Masato Ohnuma, Chan-Hung Shek\**

Yi Xu, Junye Cheng, Dr. Pak Man Yiu, Dr. Guangcun Shan, Prof. Chan-Hung Shek  
Department of Materials Science and Engineering, City University of Hong Kong,  
No.83 Tat Chee Avenue, Kowloon Tang, Hong Kong, China  
Email: apchshek@cityu.edu.hk.

Dr. Guangcun Shan.

School of Instrumentation Science and Opto-electronics Engineering, Beihang  
University, No.37 XueYuan Road, Beijing 100095, China

Prof. Tamaki Shibayama, Prof. Seiichi Watanabe

Laboratory of Quantum Energy Conversion Materials, Centre for Advanced Research  
of Energy and Materials, Division of Quantum Science and Engineering, Faculty of  
Engineering, Hokkaido University, Kita 13, Nishi 8, Kita Ku, Sapporo 0608628, Japan

Prof. Masato Ohnuma

Laboratory of Quantum Beam System Engineering, Division of Quantum Science and  
Engineering, Faculty of Engineering, Hokkaido University, Kita 13, Nishi 8, Kita Ku,  
Sapporo 0608628, Japan

## **Content of Tables**

**Figure S1** EXAFS analysis results for as cast sample, D-3, D-10 and D-30 products.

**Figure S2** Structural characterization of samples de-alloyed with different dealloying temperature.

**Figure S3** TEM image from gold nanoparticle area.

**Table S1** for EXAFS fitting parameters.

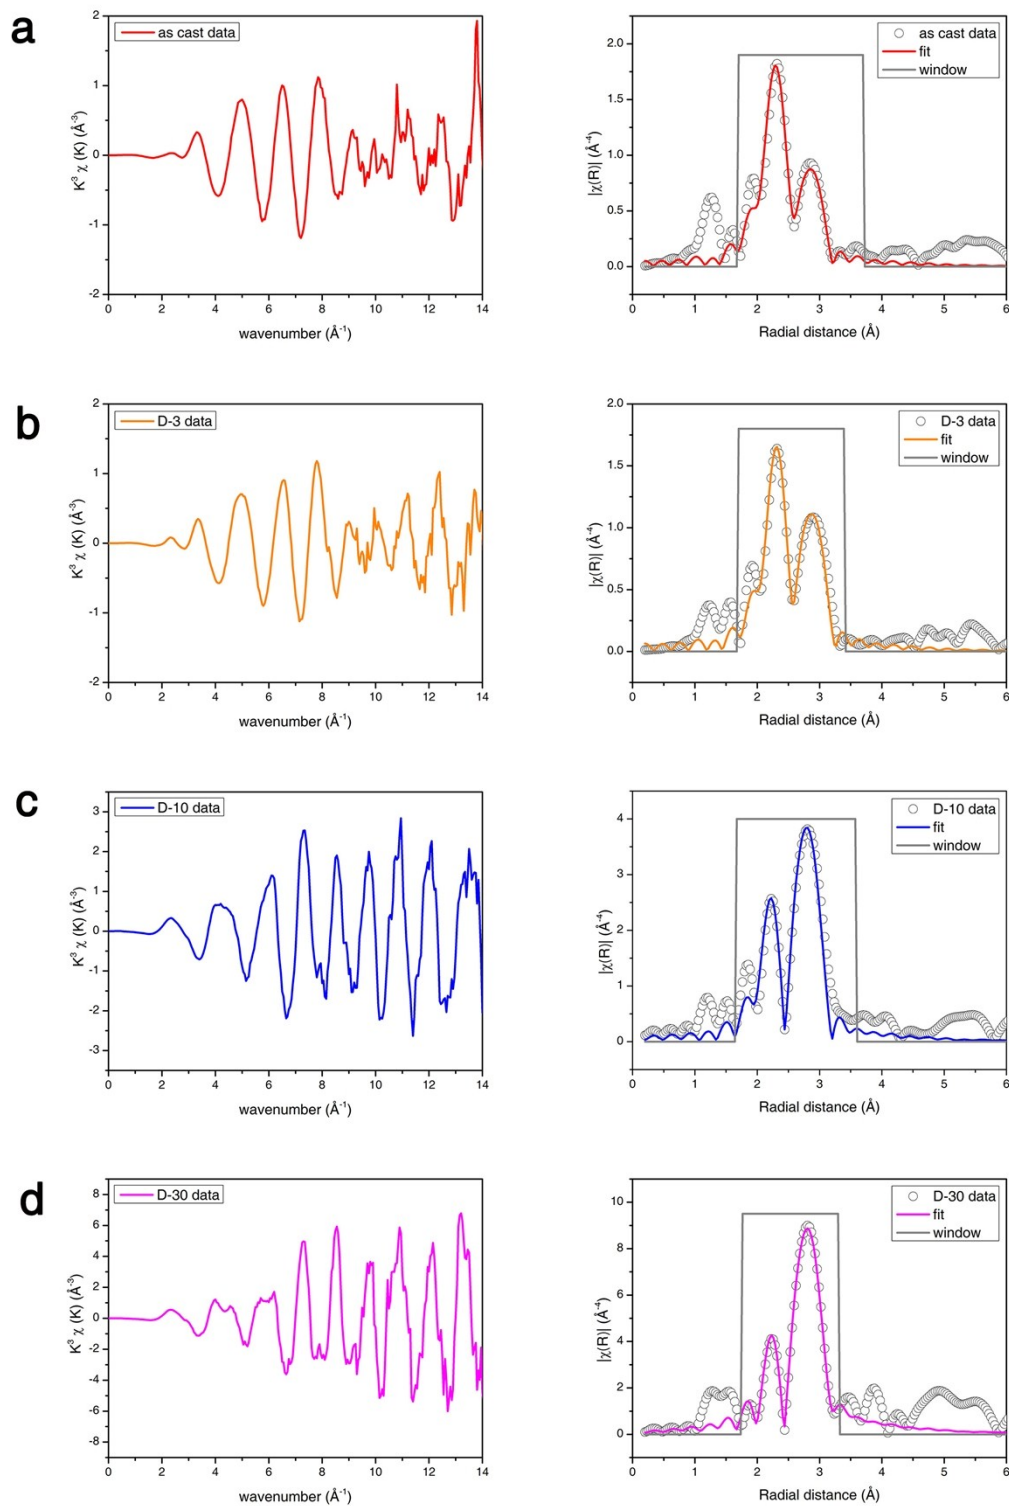

**Figure S1** EXAFS analysis results for as cast sample, D-3, D-10 and D-30 products.  $k^3$ -weighted  $\chi(k)$  EXAFS spectra for Au  $L_3$ -edge (left column) EXAFS spectra and fits to the EXAFS Fourier transforms into R space (right column). The  $\Delta R$  fitting windows are indicated on the plots.

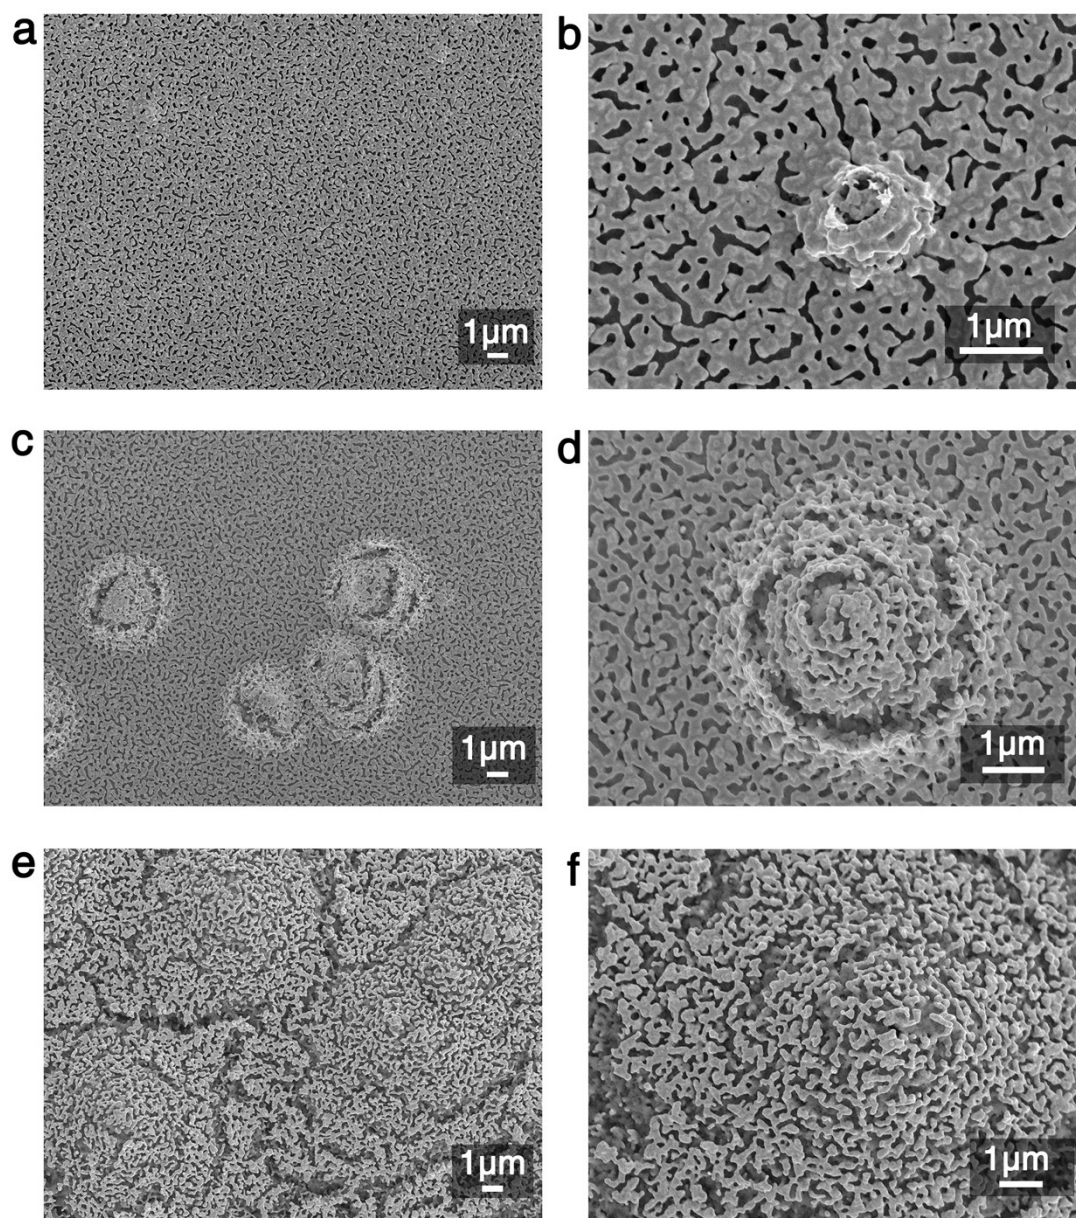

**Figure S2** Structural characterization of samples de-alloyed with different dealloying temperature. SEM images of samples de-alloyed at (a,b) 60°C; (c,d) 70°C; and 90°C(e,f) after de-alloying 30 mins.

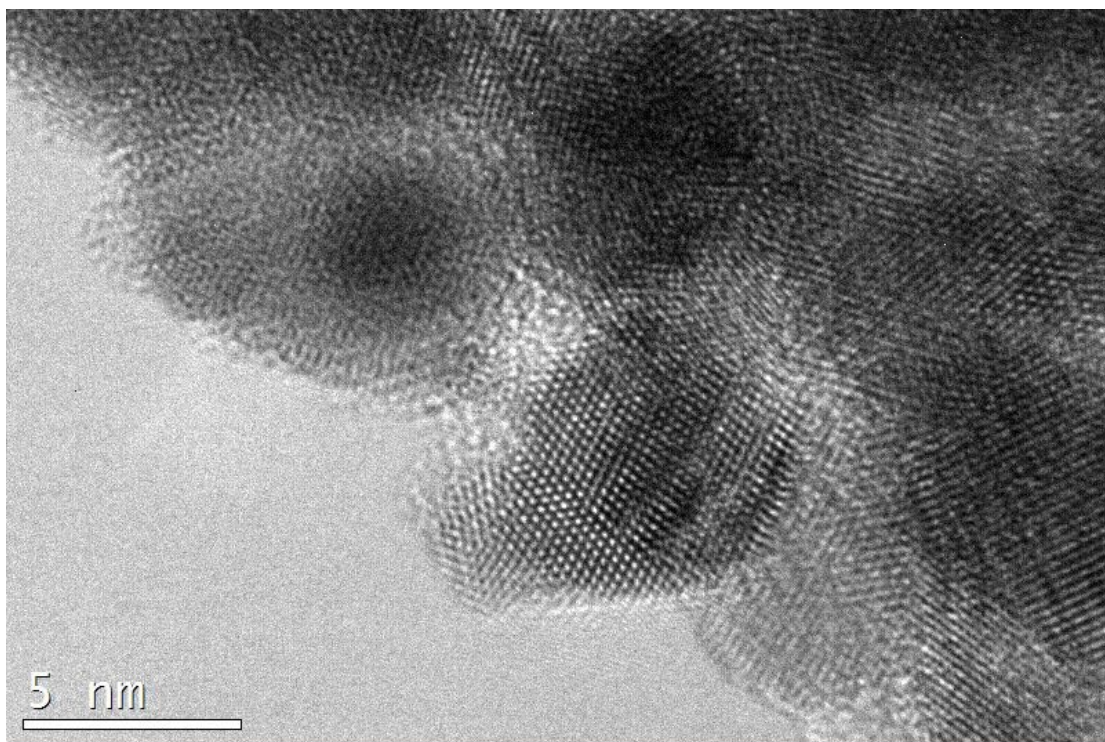

**Figure S3** TEM image from gold nanoparticle area.

**Table S1 for EXAFS fitting parameters.**

|         | CN | R (Å)   | $\sigma^2$ (Å <sup>2</sup> ) |
|---------|----|---------|------------------------------|
| As cast |    |         |                              |
| Au-Au   | 12 | 2.77(2) | 0.010(7)                     |
| Au-Si   | 2  | 2.51(2) | 0.002(9)                     |
| D-3     |    |         |                              |
| Au-Au   | 12 | 2.80(1) | 0.009(6)                     |
| Au-Si   | 2  | 2.52(4) | 0.003(1)                     |
| D-10    |    |         |                              |
| Au-Au   | 12 | 2.74(1) | 0.009(0)                     |
| Au-Si   | 2  | 2.45(3) | 0.002(5)                     |
| D-30    |    |         |                              |
| Au-Au   | 12 | 2.74(8) | 0.006(1)                     |
| Au-Si   | 2  | 2.47(8) | 0.003(1)                     |

The fitting parameters obtained from the analysis of the EXAFS spectra of for as cast, D-3, D-10, and D-30 samples. CN is the coordination number, R is the interatomic distance,  $\sigma^2$  is the Debye-Waller factor, uncertainties are given in brackets.

**Reference:**

1. Gaigher, H. L., & Van der Berg, N. G. The structure of gold silicide in thin Au/Si films. *Thin Solid Films*, **68(2)**, 373-379 (1980).
2. Ravel, B. & Newville, M. ATHENA, ARTEMIS, HEPHAESTUS: data analysis for X-ray absorption spectroscopy using IFEFFIT. *J. Synchrotron Radiat.* **12**, 537-541 (2005).
3. Heald, S. M., & Tan, Z. Interfacial reaction in a-Si/Au and a-Si/Cu thin film bilayers. *Japanese Journal of Applied Physics*, **32(S2)**, 386 (1993).
